# Supplementary material for: A relationship between membrane permeation and partitioning of nitroaromatic explosives and their functional groups. A computational study
Source: Royal Society of Chemistry journal article supplement (doi:10.1039/d0cp00549e), 2020-01-01
Supplement: d0cp00549e1.pdf [file d0cp00549e1.pdf]

Supporting information for:

**A Relationship between membrane permeation and  
partition of nitroaromatic explosives and their  
functional groups. A Computational Study**

*Hong Yang,<sup>†,‡,§</sup> Huarong Li,<sup>‡,§</sup> Mi Zhou,<sup>‡</sup> Tong Wei,<sup>‡</sup> Can Tang,<sup>‡</sup> Liu Liu<sup>‡</sup>*

*Yang Zhou,<sup>‡,\*</sup> Xiping Long<sup>‡</sup>*

*<sup>†</sup> School of Materials Science and Engineering, Tsinghua University,*

*Beijing 100084, China;*

*<sup>‡</sup> Institute of Chemical Materials, China Academy of Engineering and*

*Physics, Mianyang 621900, China.*

*\*To whom Correspondence should be addressed: zhouy@caep.cn (Y. Zhou)*

**Table S1.** The free-energy difference and preferred position ( $z_{\min}$ ) of selected nitroaromatic compounds ( $\Delta G_D$ ,  $\Delta G_B$ ,  $\Delta G_{\max}$ ,  $\Delta G_{\max-\min}$ ,  $\text{kJ}\cdot\text{mol}^{-1}$ ;  $z_{\min}$ , nm).

| Serial number | Compound  | $\Delta G_D$ | $\Delta G_B$ | $\Delta G_{\max}$ | $\Delta G_{\max-\min}$ | $z_{\min}$ |
|---------------|-----------|--------------|--------------|-------------------|------------------------|------------|
| 1             | 1-NB      | -10.8        | 4.6          | 2.1               | 12.9                   | 1.05       |
| 2             | 1,2-DNB   | -13.2        | 15.8         | 2.5               | 15.8                   | 1.27       |
| 3             | 1,3-DNB   | -10.7        | 13.5         | 2.8               | 12.9                   | 1.19       |
| 4             | 1,3,5-TNB | -11.3        | 25.1         | 13.7              | 25                     | 1.35       |
| 5             | 4-NT      | -18.3        | 3.6          | 1.1               | 20.6                   | 1.07       |
| 6             | 2,4-DNT   | -13.5        | 15.2         | 0.6               | 15.8                   | 1.22       |
| 7             | 2,6-DNT   | -14.3        | 12.3         | 1.3               | 15.5                   | 1.19       |
| 8             | TATB      | -12.1        | 43.3         | 31.2              | 43.2                   | 1.57       |
| 9             | DATB      | -10.2        | 29.2         | 19                | 29.2                   | 1.33       |
| 10            | DNAN      | -9.3         | 20.9         | 11.6              | 20.9                   | 1.39       |
| 11            | 2,4-DNP   | -11.2        | 23.9         | 12.7              | 23.8                   | 1.25       |
| 12            | PA        | -15.0        | 45.0         | 30                | 45                     | 1.43       |

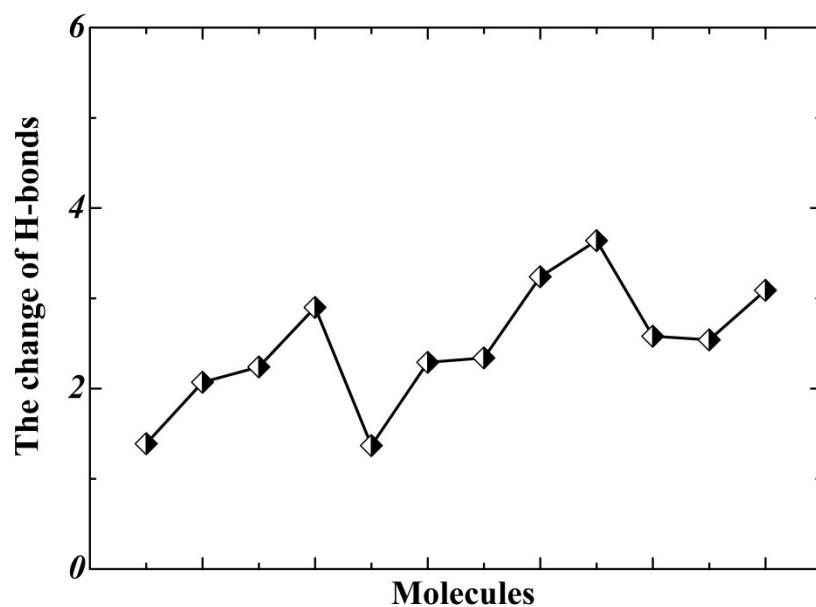

**Figure S1.** Changes in the number of total H-bonds of all compounds (with water and lipids) from the aqueous phase to the preferred position.

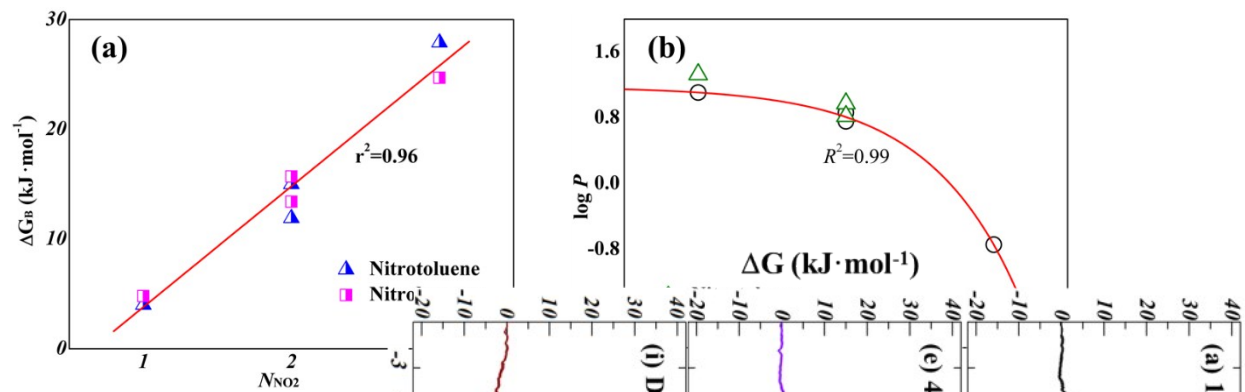

**Figure S2.** Correlation between (a)  $\text{NO}_2$  groups for selected explosives

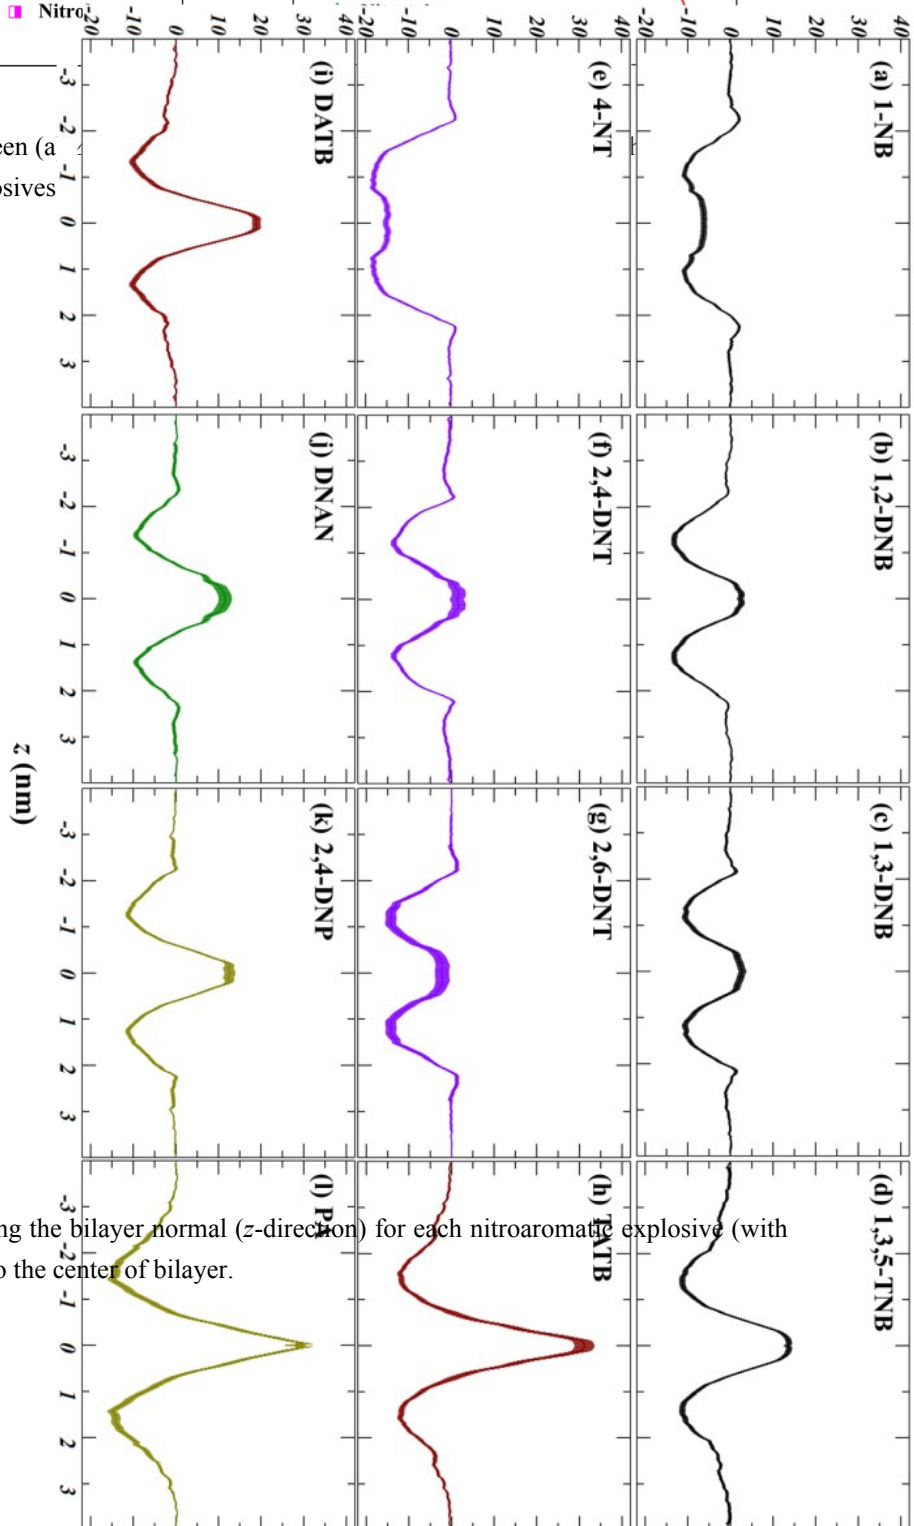

**Figure S3.** PMF profiles along the bilayer normal ( $z$ -direction) for each nitroaromatic explosive (with error bars).  $z=0$  corresponds to the center of bilayer.

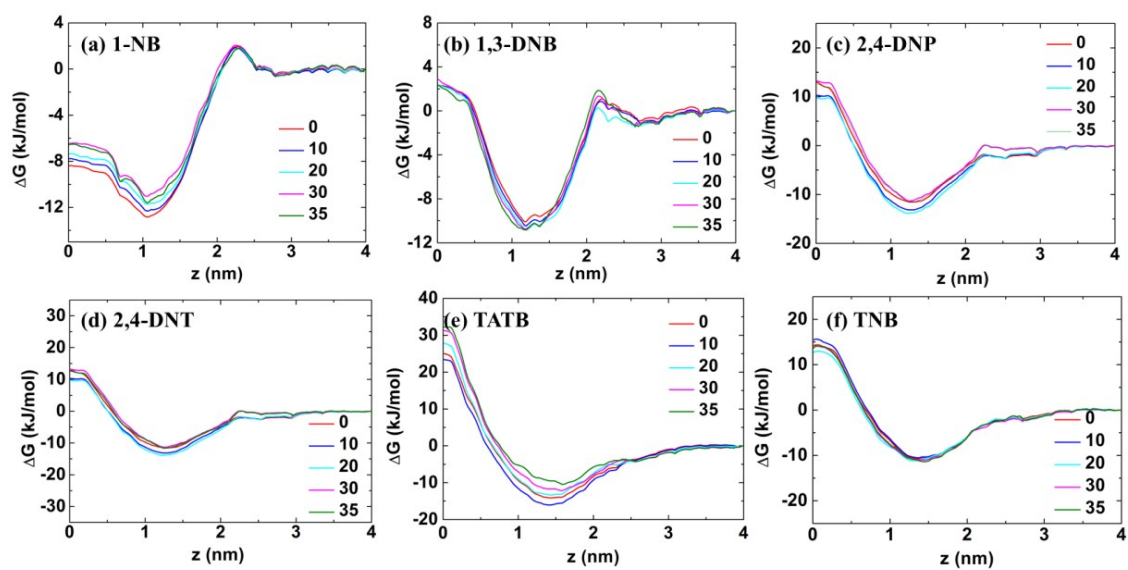

**Figure S4.** PMF profiles with different equilibration time.  $z=0$  corresponds to the center of bilayer.
